# Supplementary material
Source: PubMed Central journal article supplement (PMC3618501)
Supplement: NIHMS433622-supplement-01.pdf [file NIHMS433622-supplement-01.pdf]

### Supplement file

Supplement table 1

| Men                | L1/L2<br>(n=500) | L2/L3<br>(n=500) | L3/L4<br>(n=500) | L4/L5<br>(n=500) | $\Sigma$ L1-L4<br>(n=2000) |
|--------------------|------------------|------------------|------------------|------------------|----------------------------|
| G=1                | 91               | 147              | 168              | 198              | 604<br>(30.2%)             |
| G=2                | 22               | 38               | 27               | 70               | 157<br>(7.9%)              |
| G=3                | 5                | 9                | 16               | 27               | 57<br>(2.9%)               |
| $\Sigma$ G1-<br>G3 | 118              | 194              | 211              | 295              | 818<br>(40.9%)             |
| $\Sigma$ G2-<br>G3 | 27               | 47               | 43               | 97               | 214<br>(10.7%)             |
|                    |                  |                  |                  |                  |                            |
| Women              | L1/L2<br>(n=500) | L2/L3<br>(n=500) | L3/L4<br>(n=500) | L4/L5<br>(n=500) | $\Sigma$ L1-L4<br>(n=2000) |
| G=1                | 96               | 144              | 173              | 174              | 587<br>(29.4%)             |
| G=2                | 19               | 56               | 51               | 126              | 252<br>(12.6%)             |
| G=3                | 8                | 18               | 14               | 36               | 76<br>(3.8%)               |
| $\Sigma$ G1-<br>G3 | 123              | 218              | 238              | 336              | 915<br>(45.8%)             |
| $\Sigma$ G2-<br>G3 | 27               | 74               | 65               | 162              | 328<br>(16.4%)             |

The results in this supplement table 1 are the grading results carried out by reader 2, including 500 males and 500 females, selected sequentially such that one of every four radiographs was read. The prevalence of grade 1 disc space narrowing was slightly more common in men (30.2% vs 29.4%), and the prevalence of  $\geq$  grade 2 disc space narrowing was more common in women (16.4% vs 10.7%), the overall  $\geq$  grade 1 disc space narrowing was more common in women (45.8.0% vs 40.0%).  $\Sigma$ L1-L4: sum of the four disc levels L1/L2 to L4/L5.

Supplement table 2: Disc space narrowing score in three age groups (mean±SD of L1/L2-L4/L5).

|                        | 65~69 (yrs)            | 70~79 (yrs)            | ≥80 (yrs)             | P-value for trend |
|------------------------|------------------------|------------------------|-----------------------|-------------------|
| Male:                  | 1.959±1.849<br>(n=172) | 2.191±2.134<br>(n=293) | 3.229±3.107<br>(n=35) | P=0.001           |
| Female:                | 2.164±1.914<br>(n=165) | 2.620±2.188<br>(n=284) | 4.275±3.001<br>(n=51) | P<0.001           |
| Male Female difference | 0.205                  | 0.429                  | 1.046                 |                   |

The results in this supplement table 1 are the grading results carried out by reader 2, including 500 males and 500 females, selected sequentially such that one of every four radiographs was read. DSN severity throughout the lumbar spine increased with increasing age in both men and women (P<0.001). The difference in DSN score between males and females also increased with increasing age, being 0.205, 0.429, and 1.046 respectively in the three different age groups.

Supplement table 3a, Prevalence of disc space narrowing in each level for men and women at the age group of 65-69 years

| Men            | L1/L2<br>(n=662) | L2/L3<br>(n=662) | L3/L4<br>(n=662) | L4/L5<br>(n=662) | $\Sigma$ L1-L4<br>(n=2648) |
|----------------|------------------|------------------|------------------|------------------|----------------------------|
| G=1            | 130              | 187              | 244              | 271              | 832<br>(31.4%)             |
| G=2            | 27               | 50               | 51               | 142              | 270<br>(10.2%)             |
| G=3            | 5                | 9                | 13               | 36               | 63<br>(2.4%)               |
| $\Sigma$ G1-G3 | 162<br>(24.5%)   | 246<br>(37.2%)   | 308<br>(46.5%)   | 449<br>(67.8%)   | 1165<br>(44.0%)            |
| $\Sigma$ G2-G3 | 32<br>(4.8%)     | 59<br>(8.9%)     | 64<br>(9.7%)     | 178<br>(26.9%)   | 333<br>(12.6%)             |
|                |                  |                  |                  |                  |                            |
| Women          | L1/L2<br>(n=668) | L2/L3<br>(n=668) | L3/L4<br>(n=668) | L4/L5<br>(n=668) | $\Sigma$ L1-L4<br>(n=2672) |
| G=1            | 134              | 192              | 235              | 237              | 798<br>(29.9%)             |
| G=2            | 17               | 69               | 74               | 171              | 331<br>(12.4%)             |
| G=3            | 3                | 9                | 13               | 40               | 65<br>(2.4%)               |
| $\Sigma$ G1-G3 | 154<br>(23.1%)   | 270<br>(40.4%)   | 322<br>(48.2%)   | 448<br>(67.1%)   | 1194<br>(44.7%)            |
| $\Sigma$ G2-G3 | 20<br>(3.0%)     | 78<br>(11.7%)    | 87<br>(13.0%)    | 211<br>(31.6%)   | 396<br>(14.8%)             |

G=1, 2, 3: grade 1 grade 2 and grade 3 disc space narrowing respectively.  $\Sigma$ L1-L4: sum of the four disc levels L1/L2 to L4/L5.

Supplement table 3b, Prevalence of disc space narrowing in each level for men and women at the age group of 70-79 years.

| Men            | L1/L2<br>(n=1152) | L2/L3<br>(n=1152) | L3/L4<br>(n=1151) | L4/L5<br>(n=1152) | $\Sigma$ L1-L4<br>(n=4607) |
|----------------|-------------------|-------------------|-------------------|-------------------|----------------------------|
| G=1            | 291               | 366               | 404               | 427               | 1488<br>(32.3%)            |
| G=2            | 54                | 88                | 109               | 322               | 573<br>(12.4%)             |
| G=3            | 9                 | 31                | 47                | 105               | 192<br>(4.2%)              |
| $\Sigma$ G1-G3 | 354<br>(30.7%)    | 485<br>(42.1%)    | 560<br>(48.7%)    | 854<br>(74.1%)    | 2253<br>(48.9%)            |
| $\Sigma$ G2-G3 | 63<br>(5.5%)      | 119<br>(10.3%)    | 156<br>(13.6%)    | 427<br>(37.1%)    | 765<br>(16.6%)             |
|                |                   |                   |                   |                   |                            |
| Women          | L1/L2<br>(n=1113) | L2/L3<br>(n=1113) | L3/L4<br>(n=1112) | L4/L5<br>(n=1113) | $\Sigma$ L1-L4<br>(n=4451) |
| G=1            | 240               | 346               | 370               | 364               | 1320<br>(29.7%)            |
| G=2            | 77                | 143               | 161               | 352               | 733<br>(16.5%)             |
| G=3            | 34                | 56                | 57                | 107               | 254<br>(5.7%)              |
| $\Sigma$ G1-G3 | 351<br>(31.5%)    | 545<br>(49.0%)    | 588<br>(52.9%)    | 823<br>(73.9%)    | 2307<br>(51.8%)            |
| $\Sigma$ G2-G3 | 111<br>(10.0%)    | 199<br>(17.9%)    | 218<br>(19.6%)    | 459<br>(41.2%)    | 987<br>(22.2%)             |

G=1, 2, 3: grade 1 grade 2 and grade 3 disc space narrowing respectively.  $\Sigma$ L1-L4: sum of the four disc levels L1/L2 to L4/L5.

Supplement table 3c, Prevalence of disc space narrowing in each level for men and women aged 80 years or above.

| Men            | L1/L2<br>(n=184) | L2/L3<br>(n=184) | L3/L4<br>(n=184) | L4/L5<br>(n=184) | $\Sigma$ L1-L4<br>(n=736) |
|----------------|------------------|------------------|------------------|------------------|---------------------------|
| G=1            | 55               | 61               | 70               | 66               | 252<br>(34.2%)            |
| G=2            | 14               | 18               | 27               | 56               | 115<br>(15.6%)            |
| G=3            | 6                | 12               | 12               | 25               | 55<br>(7.5%)              |
| $\Sigma$ G1-G3 | 75<br>(40.8%)    | 91<br>(49.5%)    | 109<br>(59.2%)   | 147<br>(79.9%)   | 422<br>(57.3%)            |
| $\Sigma$ G2-G3 | 20<br>(10.9%)    | 30<br>(16.3%)    | 39<br>(21.2%)    | 81<br>(44.0%)    | 170<br>(23.1%)            |
|                |                  |                  |                  |                  |                           |
| Women          | L1/L2<br>(n=216) | L2/L3<br>(n=216) | L3/L4<br>(n=216) | L4/L5<br>(n=216) | $\Sigma$ L1-L4<br>(n=864) |
| G=1            | 73               | 74               | 68               | 54               | 269<br>(31.1%)            |
| G=2            | 24               | 40               | 46               | 66               | 176<br>(20.4%)            |
| G=3            | 14               | 24               | 27               | 46               | 111<br>(12.8%)            |
| $\Sigma$ G1-G3 | 111<br>(51.4%)   | 138<br>(63.9%)   | 141<br>(65.3%)   | 166<br>(76.9%)   | 556<br>(64.4%)            |
| $\Sigma$ G2-G3 | 38<br>(17.6%)    | 64<br>(29.6%)    | 73<br>(33.8%)    | 112<br>(51.9%)   | 287<br>(33.2%)            |

G=1, 2, 3: grade 1 grade 2 and grade 3 disc space narrowing respectively.  $\Sigma$ L1-L4: sum of the four disc levels L1/L2 to L4/L5.
